# Supplementary material for: Transcriptomic analyses of the termite, Cryptotermes secundus, reveal a gene network underlying a long lifespan and high fecundity
Source: PubMed Central journal article supplement (PMC7985136; doi:10.1038/s42003-021-01892-x), 2021-03-22
Supplement: 42003_2021_1892_MOESM11_ESM.pdf [file 42003_2021_1892_MOESM11_ESM.pdf]

## Reporting Summary

Nature Research wishes to improve the reproducibility of the work that we publish. This form provides structure for consistency and transparency in reporting. For further information on Nature Research policies, see our [Editorial Policies](#) and the [Editorial Policy Checklist](#).

### Statistics

For all statistical analyses, confirm that the following items are present in the figure legend, table legend, main text, or Methods section.

n/a Confirmed

- The exact sample size ( $n$ ) for each experimental group/condition, given as a discrete number and unit of measurement
- A statement on whether measurements were taken from distinct samples or whether the same sample was measured repeatedly
- The statistical test(s) used AND whether they are one- or two-sided  
*Only common tests should be described solely by name; describe more complex techniques in the Methods section.*
- A description of all covariates tested
- A description of any assumptions or corrections, such as tests of normality and adjustment for multiple comparisons
- A full description of the statistical parameters including central tendency (e.g. means) or other basic estimates (e.g. regression coefficient) AND variation (e.g. standard deviation) or associated estimates of uncertainty (e.g. confidence intervals)
- For null hypothesis testing, the test statistic (e.g.  $F$ ,  $t$ ,  $r$ ) with confidence intervals, effect sizes, degrees of freedom and  $P$  value noted  
*Give  $P$  values as exact values whenever suitable.*
- For Bayesian analysis, information on the choice of priors and Markov chain Monte Carlo settings
- For hierarchical and complex designs, identification of the appropriate level for tests and full reporting of outcomes
- Estimates of effect sizes (e.g. Cohen's  $d$ , Pearson's  $r$ ), indicating how they were calculated

*Our web collection on [statistics for biologists](#) contains articles on many of the points above.*

### Software and code

Policy information about [availability of computer code](#)

Data collection

No software was used.

Data analysis

We used: R (v.3.5.2), fastp (v.0.19.6), Trimmomatic (v.0.38), MultiQC (v.1.7), FastQC (v.0.11.5), HISAT2 (v.2.1.0), SAMtools (v.1.9), HTSeq (v.2.015), DESeq2 (v.1.18.1), flashClust (v.1.01-2), WGCNA (v.1.68), dynamicTreeCut (v.1.63.1), InterProScan (v.5.33-72.0), BLASTP (v.2.4.0), TopGO (v.2.32.0), clusterProfiler (v.3.8.1)

For manuscripts utilizing custom algorithms or software that are central to the research but not yet described in published literature, software must be made available to editors and reviewers. We strongly encourage code deposition in a community repository (e.g. GitHub). See the Nature Research [guidelines for submitting code & software](#) for further information.

### Data

Policy information about [availability of data](#)

All manuscripts must include a [data availability statement](#). This statement should provide the following information, where applicable:

- Accession codes, unique identifiers, or web links for publicly available datasets
- A list of figures that have associated raw data
- A description of any restrictions on data availability

The raw sequence data used in this publication are deposited at the National Center for Biotechnology Information (NCBI) under Umbrella Project "SoLong", Bioproject ID PRJNA654896, PRJNA683654, PRJNA685294.

## Field-specific reporting

Please select the one below that is the best fit for your research. If you are not sure, read the appropriate sections before making your selection.

- Life sciences       Behavioural & social sciences       Ecological, evolutionary & environmental sciences

For a reference copy of the document with all sections, see [nature.com/documents/nr-reporting-summary-flat.pdf](https://www.nature.com/documents/nr-reporting-summary-flat.pdf)

## Life sciences study design

All studies must disclose on these points even when the disclosure is negative.

|                 |                                                                                                         |
|-----------------|---------------------------------------------------------------------------------------------------------|
| Sample size     | Sample size was chosen upon availability of termite individuals.                                        |
| Data exclusions | No data were excluded.                                                                                  |
| Replication     | Exact treatment procedures and data analysis steps are provided to ensure reproducibility of the study. |
| Randomization   | Termite samples were chosen at random.                                                                  |
| Blinding        | Blinding was not possible due to a lack of expert researchers.                                          |

## Reporting for specific materials, systems and methods

We require information from authors about some types of materials, experimental systems and methods used in many studies. Here, indicate whether each material, system or method listed is relevant to your study. If you are not sure if a list item applies to your research, read the appropriate section before selecting a response.

| Materials & experimental systems    |                                                                 | Methods                             |                                                 |
|-------------------------------------|-----------------------------------------------------------------|-------------------------------------|-------------------------------------------------|
| n/a                                 | Involvement in the study                                        | n/a                                 | Involvement in the study                        |
| <input checked="" type="checkbox"/> | <input type="checkbox"/> Antibodies                             | <input checked="" type="checkbox"/> | <input type="checkbox"/> ChIP-seq               |
| <input checked="" type="checkbox"/> | <input type="checkbox"/> Eukaryotic cell lines                  | <input checked="" type="checkbox"/> | <input type="checkbox"/> Flow cytometry         |
| <input checked="" type="checkbox"/> | <input type="checkbox"/> Palaeontology and archaeology          | <input checked="" type="checkbox"/> | <input type="checkbox"/> MRI-based neuroimaging |
| <input type="checkbox"/>            | <input checked="" type="checkbox"/> Animals and other organisms |                                     |                                                 |
| <input checked="" type="checkbox"/> | <input type="checkbox"/> Human research participants            |                                     |                                                 |
| <input checked="" type="checkbox"/> | <input type="checkbox"/> Clinical data                          |                                     |                                                 |
| <input checked="" type="checkbox"/> | <input type="checkbox"/> Dual use research of concern           |                                     |                                                 |

## Animals and other organisms

Policy information about [studies involving animals](#); [ARRIVE guidelines](#) recommended for reporting animal research

|                         |                                                                                                                                                                                                                                                                                                                                                                                |
|-------------------------|--------------------------------------------------------------------------------------------------------------------------------------------------------------------------------------------------------------------------------------------------------------------------------------------------------------------------------------------------------------------------------|
| Laboratory animals      | Termite species <i>Cryptotermes secundus</i> captured in the field: workers (unknown sex) and neotenic queens (female).                                                                                                                                                                                                                                                        |
| Wild animals            | <i>Cryptotermes secundus</i> colonies were collected from dead <i>Ceriops tagal</i> mangrove trees near Palmerston-Channel Island (Darwin Harbor, Northern Territory, Australia; 12°30'S 131°00'E) and kept in <i>Pinus radiata</i> wood blocks. Shortly before extracting the tissues of interest, termite samples were killed by freezing them on ice and removing the head. |
| Field-collected samples | Colonies were kept in <i>Pinus radiata</i> wood blocks in climate rooms in Germany providing 28 °C, 70 % relative humidity and a 12 h day/night cycle. Under these conditions, colonies develop as in the field.                                                                                                                                                               |
| Ethics oversight        | The Parks and Wildlife Commission, Northern Territory, the Department of the Environment, Water, Heritage and the Arts gave permission to collect (Permit number 59044) and export (PWS2016-001559) the termites. The study was conducted according to the Nagoya protocol.                                                                                                    |

Note that full information on the approval of the study protocol must also be provided in the manuscript.
